# Supplementary material
Source: Springer Nature journal article supplement (https://www.springermedizin.de/resource/supplementary/12955_2011_970_MOESM7_ESM.pdf/9558886)
Supplement: MOESM7 [file 9558886]

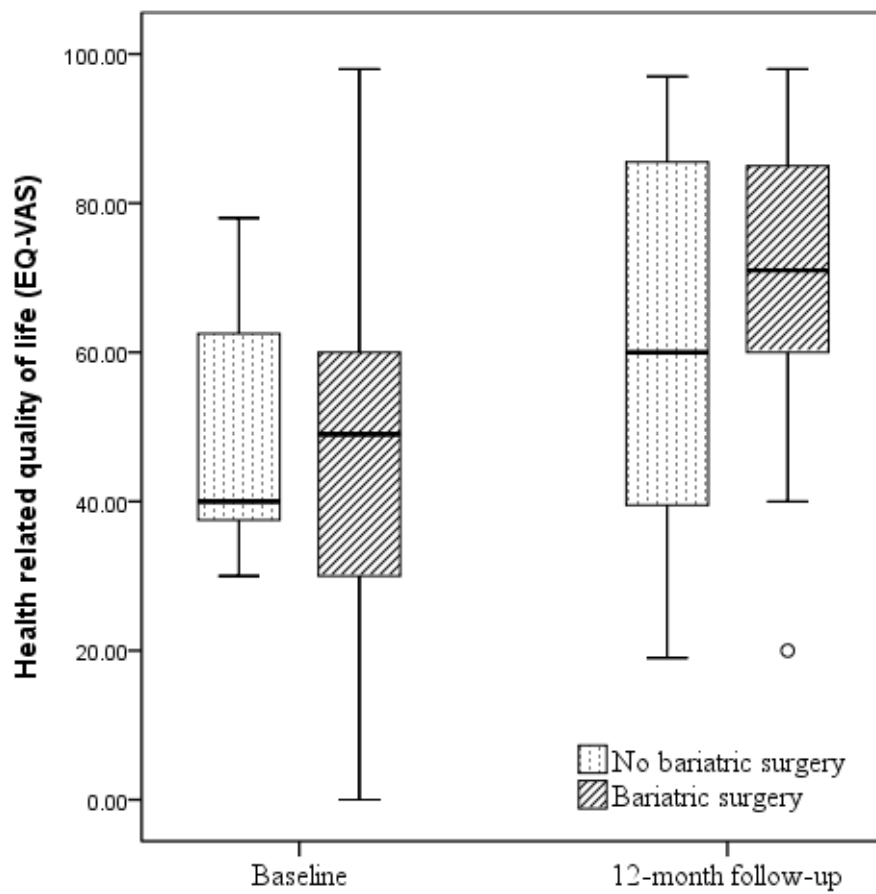

**Figure 5.** Box-plots showing participants' Health related quality of life scores (median, lower- and higher quartiles), among those who had undergone bariatric surgery during the past year ( $n = 47$ ) and those who had not ( $n = 19$ ).
